# Supplementary material
Source: bioRxiv or medRxiv preprint supplement (https://www.biorxiv.org/highwire/filestream/72700/field_highwire_adjunct_files/10/237255-9.pdf)

(A)

### Blast2GO biological process

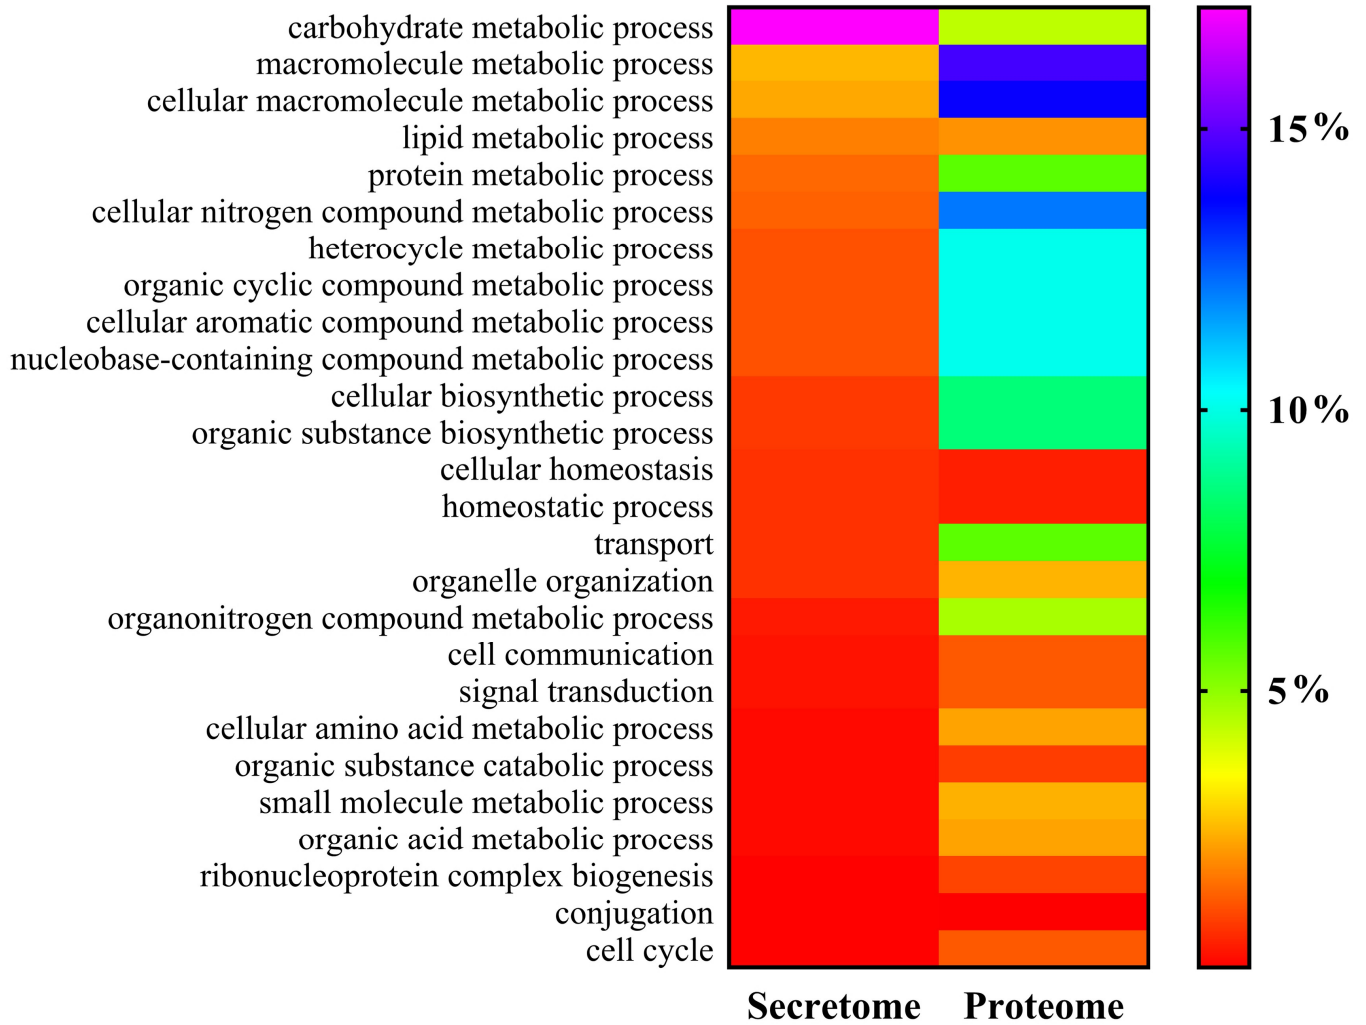

(B)

### Blast2GO molecular function

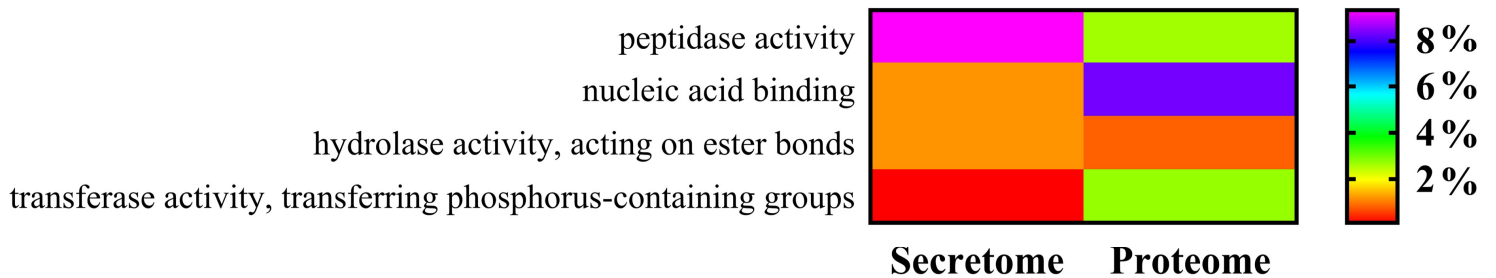

Supplement: Supplementary file [file 237255-9.pdf]
